# Supplementary material for: MOF-derived porous ZnO-Co3O4 nanocages as peroxidase mimics for colorimetric detection of copper(ii) ions in serum
Source: Royal Society of Chemistry journal article supplement (doi:10.1039/d0an01383h), 2020-11-09
Supplement: d0an01383h1.pdf [file d0an01383h1.pdf]

MOF-derived porous ZnO-Co<sub>3</sub>O<sub>4</sub> nanocages as peroxidase  
mimics for colorimetric detection of copper(II) ions in serum

Jie Lv<sup>a,1</sup>, Cong Zhang<sup>b,1</sup>, Shuangling Wang<sup>a</sup>, Wei Guo<sup>a\*</sup> and Meng Li<sup>a\*</sup>

<sup>a</sup> *College of Pharmacy, Hebei Medical University, Shijiazhuang 050017,  
China*

<sup>b</sup> *Department of Chemistry, School of Sciences, Hebei University of  
Science and Technology, Shijiazhuang 050018, China*

<sup>1</sup> *Jie Lv and Cong Zhang contributed equally to this work.*

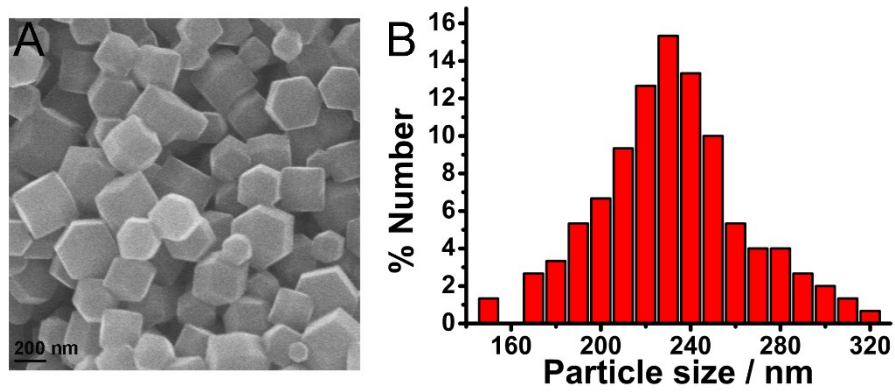

**Figure S1** (A) The SEM image of ZnCo-ZIF. (B) Histogram of the size distribution of ZnCo-ZIF.

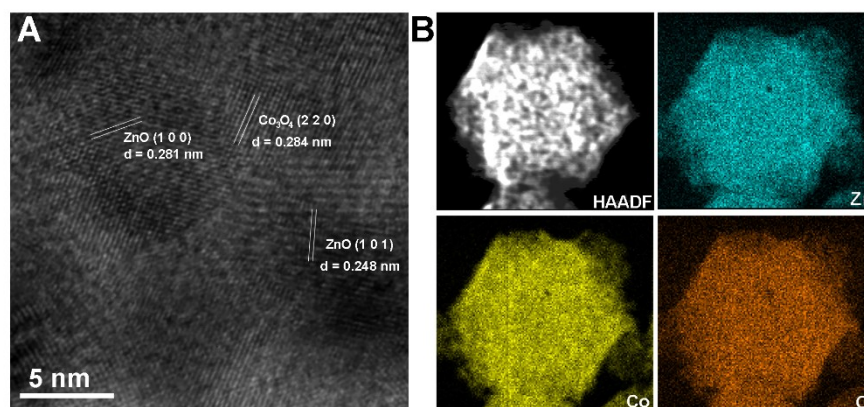

**Figure S2** (A) HRTEM image of ZnO-Co<sub>3</sub>O<sub>4</sub> NCs. (B) TEM elemental mappings of ZnO-Co<sub>3</sub>O<sub>4</sub> NCs.

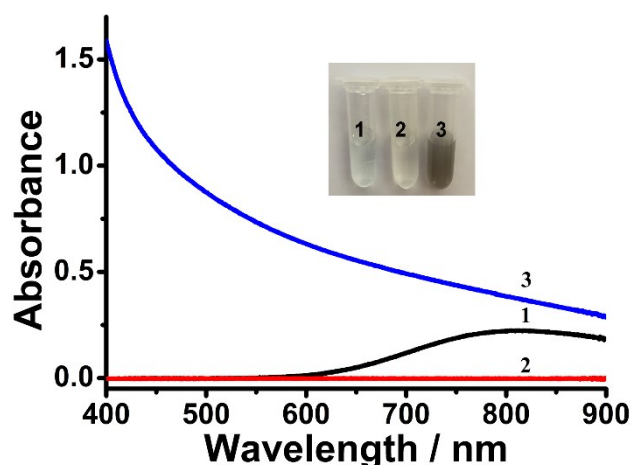

**Figure S3** The UV-Vis spectra of  $\text{Cu}^{2+}$  and Cys at high concentrations. Insert were the corresponding photographs of different samples. 1: 20 mM  $\text{Cu}^{2+}$ , 2: 20 mM Cys, 3: 20 mM  $\text{Cu}^{2+}$  + 20 mM Cys.

As indicated in Figure S3, after mixing  $\text{Cu}^{2+}$  and Cys, the insoluble products were generated, demonstrating that Cys can react with  $\text{Cu}^{2+}$  to give mercaptide.

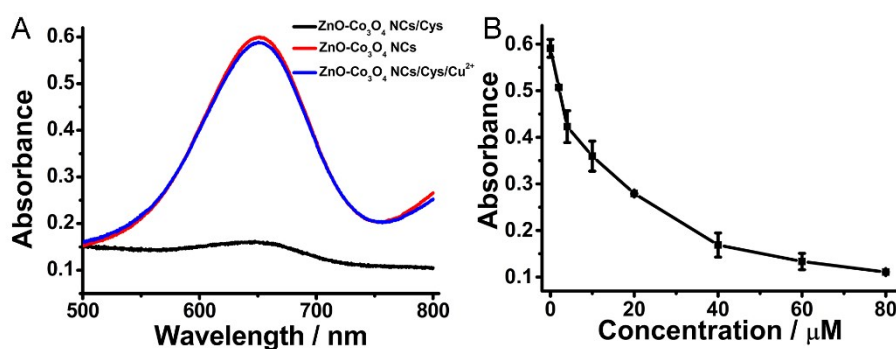

**Figure S4** (A) The absorbance spectra of the different reaction systems containing  $\text{ZnO-Co}_3\text{O}_4$  NCs,  $\text{ZnO-Co}_3\text{O}_4$  NCs/Cys and  $\text{ZnO-Co}_3\text{O}_4$  NCs/Cys/ $\text{Cu}^{2+}$ . (B) The change of peroxidase activity of  $\text{ZnO-Co}_3\text{O}_4$  NCs in the presence of different concentrations of Cys.

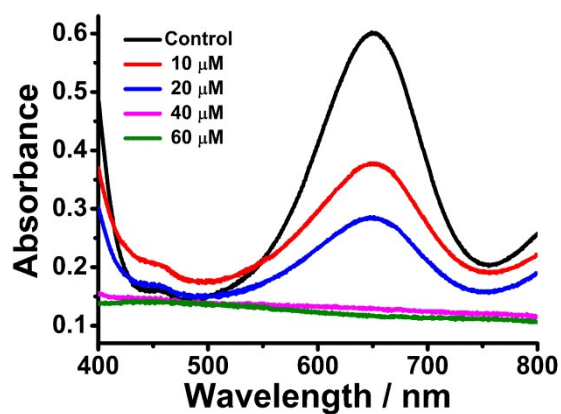

**Figure S5** The reduction of oxidized TMB induced by different concentrations of Cys.

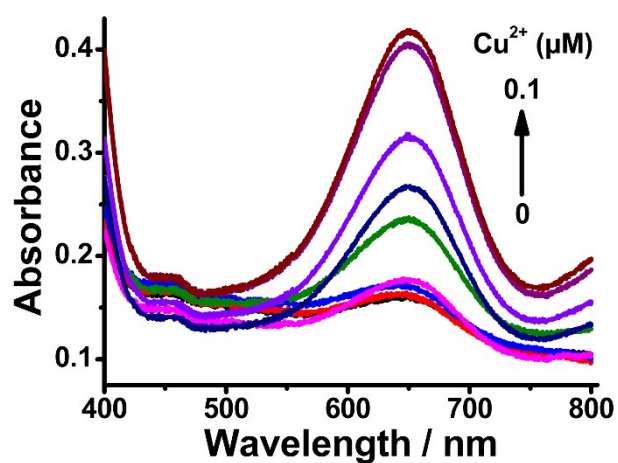

**Figure S6** The absorbance spectra of TMB in the reaction systems of ZnO-Co<sub>3</sub>O<sub>4</sub> NCs/Cys containing different concentrations of Cu<sup>2+</sup>.

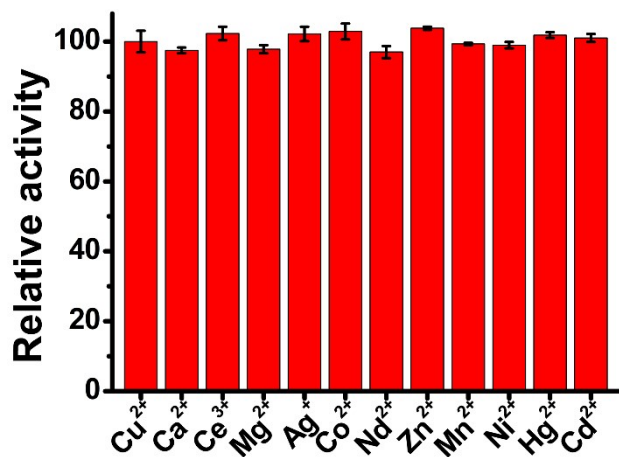

**Figure S7** The responses of ZnO-Co<sub>3</sub>O<sub>4</sub> NCs/Cys to Cu<sup>2+</sup> in the presence of other metal ions. The concentrations of other metal ions and Cu<sup>2+</sup> were 1 μM and 0.1 μM, respectively.

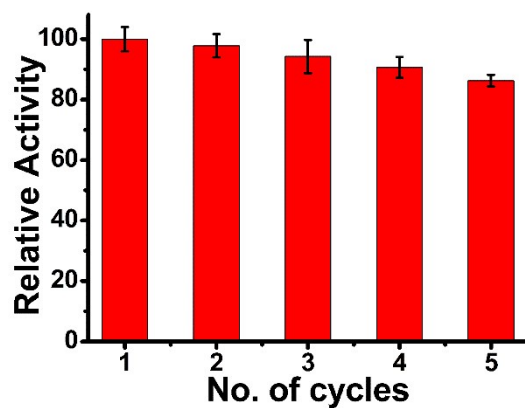

**Figure S8** The responses of the ZnO-Co<sub>3</sub>O<sub>4</sub> NCs to Cu<sup>2+</sup> in five successive recycling catalysis.

**Table S1** The comparison of the analytical performance of this method for Cu<sup>2+</sup> detection with previous nanomaterials based colorimetric methods.

| Nanomaterials                              | LOD ( $\mu\text{M}$ ) | linear range ( $\mu\text{M}$ ) | References |
|--------------------------------------------|-----------------------|--------------------------------|------------|
| Urchin-like Co <sub>9</sub> S <sub>8</sub> | 0.09                  | 0.5-10                         | [45]       |
| 4-MBA modified AgNPs                       | 0.025                 | 0.1-100                        | [46]       |
| GSH-AuNCs                                  | 0.011                 | 0.1-1                          | [47]       |
| rGO@AgNPs                                  | 0.0098                | 0.02-1.5                       | [48]       |
| N-CDots/AuNCs                              | 0.15                  | 1-60                           | [49]       |
| DNA modified AuNPs                         | 20                    | 20-100                         | [50]       |
| ZnO-Co <sub>3</sub> O <sub>4</sub> NCs     | 0.00108               | 0.002-0.1                      | This work  |
